# Supplementary material
Source: MDPI journal article supplement (https://www.mdpi.com/2076-3417/14/8/3281)
Supplement: s1 [file s1]

## Supplementary file

### Ensuring quality of the analytical process in a research laboratory

**Table S1.** Control card Fig. 3 Data: (a) standard solution 0.6 mg/L P2O5.

| 0.6       | mean  | 0.4110  |                       |        |        |        |        |        |
|-----------|-------|---------|-----------------------|--------|--------|--------|--------|--------|
|           | stdev | 0.00787 |                       |        |        |        |        |        |
|           |       |         |                       |        | UCL    |        | LCL    |        |
| Date      | 1.1   | 1.2     | Average<br>Absorbance | Mean   | 1s     | 2s     | 1s     | 2s     |
| 2/9/2023  | 0.421 |         | 0.4210                | 0.4110 | 0.4188 | 0.4267 | 0.4031 | 0.3952 |
| 3/6/2023  | 0.421 | 0.419   | 0.4200                | 0.4110 | 0.4188 | 0.4267 | 0.4031 | 0.3952 |
| 3/18/2023 | 0.406 | 0.408   | 0.4070                | 0.4110 | 0.4188 | 0.4267 | 0.4031 | 0.3952 |
| 3/20/2023 | 0.411 |         | 0.4110                | 0.4110 | 0.4188 | 0.4267 | 0.4031 | 0.3952 |
| 3/22/2023 | 0.41  |         | 0.4100                | 0.4110 | 0.4188 | 0.4267 | 0.4031 | 0.3952 |
| 3/24/2023 | 0.411 |         | 0.4110                | 0.4110 | 0.4188 | 0.4267 | 0.4031 | 0.3952 |
| 3/31/2023 | 0.406 |         | 0.4060                | 0.4110 | 0.4188 | 0.4267 | 0.4031 | 0.3952 |
| 4/11/2023 | 0.404 |         | 0.4040                | 0.4110 | 0.4188 | 0.4267 | 0.4031 | 0.3952 |
| 5/9/2023  | 0.414 |         | 0.4140                | 0.4110 | 0.4188 | 0.4267 | 0.4031 | 0.3952 |
| 7/14/2023 | 0.43  | 0.424   | 0.4270                | 0.4110 | 0.4188 | 0.4267 | 0.4031 | 0.3952 |
| 7/17/2023 | 0.403 |         | 0.4030                | 0.4110 | 0.4188 | 0.4267 | 0.4031 | 0.3952 |
| 7/19/2023 | 0.414 |         | 0.4140                | 0.4110 | 0.4188 | 0.4267 | 0.4031 | 0.3952 |
| 7/20/2023 | 0.416 | 0.413   | 0.4145                | 0.4110 | 0.4188 | 0.4267 | 0.4031 | 0.3952 |
| 7/21/2023 | 0.404 |         | 0.4040                | 0.4110 | 0.4188 | 0.4267 | 0.4031 | 0.3952 |
| 7/24/2023 | 0.412 | 0.41    | 0.4110                | 0.4110 | 0.4188 | 0.4267 | 0.4031 | 0.3952 |
| 7/25/2023 | 0.423 | 0.422   | 0.4225                | 0.4110 | 0.4188 | 0.4267 | 0.4031 | 0.3952 |
| 7/26/2023 | 0.422 |         | 0.4220                | 0.4110 | 0.4188 | 0.4267 | 0.4031 | 0.3952 |
| 7/28/2023 | 0.415 | 0.418   | 0.4165                | 0.4110 | 0.4188 | 0.4267 | 0.4031 | 0.3952 |
| 7/29/2023 | 0.412 | 0.41    | 0.4110                | 0.4110 | 0.4188 | 0.4267 | 0.4031 | 0.3952 |
| 7/30/2023 | 0.395 |         | 0.3950                | 0.4110 | 0.4188 | 0.4267 | 0.4031 | 0.3952 |
| 7/31/2023 | 0.399 |         | 0.3990                | 0.4110 | 0.4188 | 0.4267 | 0.4031 | 0.3952 |
| 8/1/2023  | 0.423 | 0.423   | 0.4230                | 0.4110 | 0.4188 | 0.4267 | 0.4031 | 0.3952 |
| 8/2/2023  | 0.401 |         | 0.4010                | 0.4110 | 0.4188 | 0.4267 | 0.4031 | 0.3952 |
| 8/8/2023  | 0.396 |         | 0.3960                | 0.4110 | 0.4188 | 0.4267 | 0.4031 | 0.3952 |
| 8/11/2023 | 0.352 | 0.432   | 0.3920                | 0.4110 | 0.4188 | 0.4267 | 0.4031 | 0.3952 |
| 8/14/2023 | 0.406 | 0.404   | 0.4050                | 0.4110 | 0.4188 | 0.4267 | 0.4031 | 0.3952 |
| 8/15/2023 | 0.41  | 0.407   | 0.4085                | 0.4110 | 0.4188 | 0.4267 | 0.4031 | 0.3952 |
| 8/16/2023 | 0.411 | 0.409   | 0.4100                | 0.4110 | 0.4188 | 0.4267 | 0.4031 | 0.3952 |
| 8/21/2023 | 0.406 | 0.404   | 0.4050                | 0.4110 | 0.4188 | 0.4267 | 0.4031 | 0.3952 |
| 8/22/2023 | 0.407 | 0.406   | 0.4065                | 0.4110 | 0.4188 | 0.4267 | 0.4031 | 0.3952 |
| 8/30/2023 | 0.418 | 0.418   | 0.4180                | 0.4110 | 0.4188 | 0.4267 | 0.4031 | 0.3952 |
| 8/31/2023 | 0.408 | 0.407   | 0.4075                | 0.4110 | 0.4188 | 0.4267 | 0.4031 | 0.3952 |
| 9/1/2023  | 0.42  | 0.418   | 0.4190                | 0.4110 | 0.4188 | 0.4267 | 0.4031 | 0.3952 |
| 9/4/2023  | 0.411 | 0.408   | 0.4095                | 0.4110 | 0.4188 | 0.4267 | 0.4031 | 0.3952 |
| 9/5/2023  | 0.411 | 0.41    | 0.4105                | 0.4110 | 0.4188 | 0.4267 | 0.4031 | 0.3952 |
| 9/7/2023  | 0.409 | 0.41    | 0.4095                | 0.4110 | 0.4188 | 0.4267 | 0.4031 | 0.3952 |
| 9/8/2023  | 0.406 | 0.406   | 0.4060                | 0.4110 | 0.4188 | 0.4267 | 0.4031 | 0.3952 |
| 9/11/2023 | 0.413 | 0.413   | 0.4130                | 0.4110 | 0.4188 | 0.4267 | 0.4031 | 0.3952 |

|           |       |       |        |        |        |        |        |        |
|-----------|-------|-------|--------|--------|--------|--------|--------|--------|
| 9/12/2023 | 0.42  |       | 0.4200 | 0.4110 | 0.4188 | 0.4267 | 0.4031 | 0.3952 |
| 9/13/2023 | 0.418 |       | 0.4180 | 0.4110 | 0.4188 | 0.4267 | 0.4031 | 0.3952 |
| 9/14/2023 | 0.412 | 0.414 | 0.4130 | 0.4110 | 0.4188 | 0.4267 | 0.4031 | 0.3952 |
| 9/18/2023 | 0.413 | 0.412 | 0.4125 | 0.4110 | 0.4188 | 0.4267 | 0.4031 | 0.3952 |
| 9/19/2023 | 0.407 | 0.409 | 0.4080 | 0.4110 | 0.4188 | 0.4267 | 0.4031 | 0.3952 |
| 9/21/2023 | 0.419 | 0.42  | 0.4195 | 0.4110 | 0.4188 | 0.4267 | 0.4031 | 0.3952 |
| 10/3/2023 | 0.419 | 0.419 | 0.4190 | 0.4110 | 0.4188 | 0.4267 | 0.4031 | 0.3952 |

**Table S2.** In-lab control sample – arable soil

|               |       |      | Mean:   | 6.08    |      |      |      |      |
|---------------|-------|------|---------|---------|------|------|------|------|
|               |       |      | stdev:  | 1.04024 |      |      |      |      |
| P2O5, mg/100g |       |      |         |         | UCL  | LCL  |      |      |
| Date          | 1.1   | 1.2  | Average | Mean    | 1s   | 2s   | 1s   | 2s   |
| 7/31/2023     | 10.12 | 7.20 | 8.66    | 6.08    | 7.12 | 8.16 | 5.04 | 4.00 |
| 8/1/2023      | 6.26  | 5.28 | 5.77    | 6.08    | 7.12 | 8.16 | 5.04 | 4.00 |
| 8/2/2023      | 5.19  |      | 5.19    | 6.08    | 7.12 | 8.16 | 5.04 | 4.00 |
| 8/7/2023      | 7.12  | 4.66 | 5.89    | 6.08    | 7.12 | 8.16 | 5.04 | 4.00 |
| 8/8/2023      | 6.23  | 5.52 | 5.88    | 6.08    | 7.12 | 8.16 | 5.04 | 4.00 |
| 8/10/2023     | 5.04  |      | 5.04    | 6.08    | 7.12 | 8.16 | 5.04 | 4.00 |
| 8/11/2023     | 5.70  |      | 5.70    | 6.08    | 7.12 | 8.16 | 5.04 | 4.00 |
| 8/14/2023     | 5.17  | 5.84 | 5.51    | 6.08    | 7.12 | 8.16 | 5.04 | 4.00 |
| 8/15/2023     | 5.89  |      | 5.89    | 6.08    | 7.12 | 8.16 | 5.04 | 4.00 |
| 8/16/2023     | 5.57  | 6.10 | 5.83    | 6.08    | 7.12 | 8.16 | 5.04 | 4.00 |
| 8/21/2023     | 5.85  |      | 5.85    | 6.08    | 7.12 | 8.16 | 5.04 | 4.00 |
| 8/22/2023     | 5.85  | 5.15 | 5.50    | 6.08    | 7.12 | 8.16 | 5.04 | 4.00 |
| 8/23/2023     | 5.35  | 5.20 | 5.28    | 6.08    | 7.12 | 8.16 | 5.04 | 4.00 |
| 8/24/2023     | 4.88  | 4.39 | 4.63    | 6.08    | 7.12 | 8.16 | 5.04 | 4.00 |
| 8/25/2023     | 7.57  |      | 7.57    | 6.08    | 7.12 | 8.16 | 5.04 | 4.00 |
| 8/28/2023     | 4.71  | 4.82 | 4.77    | 6.08    | 7.12 | 8.16 | 5.04 | 4.00 |
| 8/29/2023     | 4.87  | 4.80 | 4.84    | 6.08    | 7.12 | 8.16 | 5.04 | 4.00 |
| 8/30/2023     | 4.74  | 5.62 | 5.18    | 6.08    | 7.12 | 8.16 | 5.04 | 4.00 |
| 8/31/2023     | 6.31  | 6.30 | 6.31    | 6.08    | 7.12 | 8.16 | 5.04 | 4.00 |
| 9/1/2023      | 4.86  | 4.24 | 4.55    | 6.08    | 7.12 | 8.16 | 5.04 | 4.00 |
| 9/4/2023      | 5.60  | 6.95 | 6.27    | 6.08    | 7.12 | 8.16 | 5.04 | 4.00 |
| 9/5/2023      | 6.12  | 5.62 | 5.87    | 6.08    | 7.12 | 8.16 | 5.04 | 4.00 |
| 9/7/2023      | 7.09  | 5.48 | 6.28    | 6.08    | 7.12 | 8.16 | 5.04 | 4.00 |
| 9/8/2023      | 5.77  |      | 5.77    | 6.08    | 7.12 | 8.16 | 5.04 | 4.00 |
| 9/11/2023     | 7.98  | 8.34 | 8.16    | 6.08    | 7.12 | 8.16 | 5.04 | 4.00 |
| 9/14/2023     | 6.53  |      | 6.53    | 6.08    | 7.12 | 8.16 | 5.04 | 4.00 |
| 9/18/2023     | 7.32  | 5.28 | 6.30    | 6.08    | 7.12 | 8.16 | 5.04 | 4.00 |
| 9/19/2023     | 5.24  | 5.19 | 5.21    | 6.08    | 7.12 | 8.16 | 5.04 | 4.00 |
| 9/21/2023     | 5.87  | 6.06 | 5.96    | 6.08    | 7.12 | 8.16 | 5.04 | 4.00 |
| 9/22/2023     | 6.18  |      | 6.18    | 6.08    | 7.12 | 8.16 | 5.04 | 4.00 |
| 9/25/2023     | 7.00  | 8.80 | 7.90    | 6.08    | 7.12 | 8.16 | 5.04 | 4.00 |
| 9/26/2023     | 7.79  | 7.84 | 7.82    | 6.08    | 7.12 | 8.16 | 5.04 | 4.00 |
| 9/27/2023     | 5.63  | 5.99 | 5.81    | 6.08    | 7.12 | 8.16 | 5.04 | 4.00 |
| 9/29/2023     | 5.86  | 5.95 | 5.91    | 6.08    | 7.12 | 8.16 | 5.04 | 4.00 |
| 9/30/2023     | 6.67  |      | 6.67    | 6.08    | 7.12 | 8.16 | 5.04 | 4.00 |
| 10/3/2023     | 6.29  |      | 6.29    | 6.08    | 7.12 | 8.16 | 5.04 | 4.00 |
| 10/6/2023     | 6.26  |      | 6.26    | 6.08    | 7.12 | 8.16 | 5.04 | 4.00 |
| 10/9/2023     | 4.82  |      | 4.82    | 6.08    | 7.12 | 8.16 | 5.04 | 4.00 |

|           |      |      |      |      |      |      |      |
|-----------|------|------|------|------|------|------|------|
| #####     | 6.69 | 6.69 | 6.08 | 7.12 | 8.16 | 5.04 | 4.00 |
| #####     | 5.01 | 5.01 | 6.08 | 7.12 | 8.16 | 5.04 | 4.00 |
| #####     | 7.31 | 7.31 | 6.08 | 7.12 | 8.16 | 5.04 | 4.00 |
| #####     | 8.76 | 8.76 | 6.08 | 7.12 | 8.16 | 5.04 | 4.00 |
| 11/6/2023 | 5.77 | 5.77 | 6.08 | 7.12 | 8.16 | 5.04 | 4.00 |

**Table S3:** Density of  $(GeTe_4)_{95}In_5$

| $(GeTe_4)_{95}In_5$ | Masse (g/cm <sup>3</sup> ) |       |       |       |       |       | Average |
|---------------------|----------------------------|-------|-------|-------|-------|-------|---------|
| Sample 1            | 5,978                      | 5,959 | 5,978 | 5,992 | 5,955 | 6,030 | 5,986   |
| Sample 2            | 5,822                      | 5,827 | 5,990 | 5,955 | 5,823 | 5,827 | 5,874   |
| Sample 3            | 5,919                      | 5,922 | 5,948 | 5,920 |       |       | 5,927   |

Final result:  $\rho(GeTe_4)_{95}In_5 = 5993 \text{ kg/m}^3$

**Table S4:** Density of  $(GeTe_4)_{95}In_{10}$

| $(GeTe_4)_{90}In_{10}$ | Masse (g/cm <sup>3</sup> ) |       |       |       |       | Average |
|------------------------|----------------------------|-------|-------|-------|-------|---------|
| Sample 1               | 5.765                      | 5.746 | 5.745 | 5.723 | 5.743 | 5.744   |
| Sample 2               | 5.664                      | 5.723 | 5.685 | 5.664 |       | 5.684   |
| Sample 3               | 5.676                      | 5.674 | 5.674 |       |       | 5.675   |

Final result:  $\rho(GeTe_4)_{90}In_{10} = 5707 \text{ kg/m}^3$

**Table S5:** Density determined by pycnometer

| A)                     | $\rho_0$<br>kg/m <sup>3</sup> | m<br>kg. <sup>10-3</sup> | $m_1$<br>kg. <sup>10-3</sup> | $m_2$<br>kg. <sup>10-3</sup> | $\rho$<br>kg/m <sup>3</sup> |
|------------------------|-------------------------------|--------------------------|------------------------------|------------------------------|-----------------------------|
| $(GeTe_4)_{95}In_5$    | 998.62                        | 3.6446                   | 44.6699                      | 47.7003                      | 5926                        |
| $(GeTe_4)_{90}In_{10}$ | 998.43                        | 2.1485                   | 44.6377                      | 46.3985                      | 5533                        |
